# Supplementary material
Source: publisher site journal article supplement (http://www.spandidos-publications.com/6223/downloadSupplementary)
Supplement: Supplementary file 1 [file downloadSupplementary]

## Sheet: Sheet1
Table SI. Merged autophagy-related gene set
ABCB6
ABHD5
ABL1
ABL2
ABR
ACAP2
ACAP3
ACBD5
ACLY
ACP2
ACSL1
ACTA1
ACTA2
ACTB
ACTC1
ACTG1
ACTG2
ACTR2
ACTR3
ACTR3B
ADIPOQ
AES
AFG3L2
AGER
AGFG1
AGT
AGTR1
AGTR2
AKT1
AKT1S1
AKT2
AKT3
ALB
ALK
ALPI
ALPL
ALPP
ALPPL2
AMBRA1
AMFR
ANK1
ANK2
ANK3
ANKK1
ANKRD28
ANKRD44
ANXA7
AP1AR
AP1B1
AP1G1
AP1G2
AP1M1
AP1M2
AP1S1
AP1S2
AP1S3
AP2A1
AP2A2
AP2B1
AP2M1
AP2S1
AP3D1
AP3M1
AP3M2
AP4B1
AP4E1
AP4M1
APAF1
APOL1
APOL6
APP
ARAF
ARF6
ARFGEF1
ARFGEF2
ARHGAP10
ARHGAP26
ARHGAP42
ARHGEF17
ARHGEF4
ARHGEF9
ARL2
ARNT
ARNT2
ARNTL
ARNTL2
ARSA
ARSB
ATF4
ATF6
ATG10
ATG101
ATG12
ATG13
ATG14
ATG16L1
ATG16L2
ATG2A
ATG2B
ATG3
ATG4A
ATG4B
ATG4C
ATG4D
ATG5
ATG7
ATG9
ATG9A
ATG9B
ATIC
ATM
ATP13A2
ATR
AURKA
AXL
BAD
BAG1
BAG3
BAG6
BAIAP2
BAK1
BAX
BBC3
BCKDHA
BCL2
BCL2L1
BCL2L11
BCR
BDNF
BECN1
BECN2
BID
BIRC2
BIRC5
BIRC6
BLK
BMF
BNIP1
BNIP3
BNIP3L
BOK
BRAF
BRCA1
BRSK1
BRSK2
BST2
FAM215A
C19orf12
C9orf72
CALCOCO2
CAMK1
CAMK1D
CAMK1G
CAMK2B
CAMK2D
CAMK2G
CAMK4
CAMKK1
CAMKK2
CAMP
CANX
CAPN1
CAPN10
CAPN11
CAPN12
CAPN13
CAPN14
CAPN2
CAPN3
CAPN5
CAPN6
CAPN7
CAPN8
CAPN9
CAPNS1
CAPNS2
CASP1
CASP2
CASP3
CASP4
CASP8
CASP9
CAST
CAT
CATSPER4
CCL2
CCND1
CCR2
CD38
CD4
CD46
CDK1
CDK11A
CDK13
CDK16
CDK17
CDK18
CDK2
CDK5
CDKL1
CDKL4
CDKL5
CDKN1A
CDKN1B
CDKN2A
CDKN2D
CEBPB
CELF1
CELF3
CELF5
CFLAR
CHEK1
CHMP2A
CHMP2B
CHMP3
CHMP4A
CHMP4B
CHMP4C
CHMP6
CHRND
CHUK
CISD1
CISD2
CLEC11A
CLEC12A
CLEC16A
CLN3
CLOCK
CLTA
CLTB
CLTC
COPZ1
COX5A
CSF2
CSHL1
CSNK1A1L
CSNK1D
CSNK1G2
CSNK2A1
CSNK2A2
CSNK2B
CTNNB1
CTSB
CTSD
CTSE
CTSL
CTSL1
CTSV
CX3CL1
CXCL12
CXCR3
CXCR4
CYB5A
CYBB
DACT1
DAP
DAP3
DAPK1
DAPK2
DAPK3
DAW1
DCN
DDIT3
DDIT4
DENND3
DEPTOR
DES
DICER1
DIRAS3
DLC1
DNAJA3
DNAJB1
DNAJB9
DNM1
DNM1L
DNM2
DNM3
DNPEP
DRAM1
DRAM2
DUSP4
DVL2
E2F1
E2F2
EDEM1
EEF1A1
EEF1A2
EEF2
EEF2K
EGFR
EI24
EIF2AK1
EIF2AK2
EIF2AK3
EIF2AK4
EIF2B1
EIF2S1
EIF4E
EIF4E1B
EIF4EBP1
EIF4EBP2
EIF4EBP3
EIF4G1
EIF4G2
ENG
EP300
EPAS1
EPG5
EPHA2
EPHA3
EPHA4
EPHA5
EPHB1
EPHB2
EPHB3
EPM2A
EPN1
EPN2
EPN3
EPO
ERBB2
ERBB3
ERBB4
ERBIN
ERFE
ERN1
ERN2
ERO1L
EVA1A
EXOC1
EXOC2
EXOC3
EXOC3L1
EXOC3L4
EXOC4
EXOC5
EXOC6
EXOC6B
EXOC7
EXOC8
FADD
FAM48A
FAS
FBXL2
FBXL20
FBXO7
FBXW7
FBXW7-AS1
FGFR1
FGFR2
FGFR3
FGR
FIS1
FKBP1A
FKBP1B
FKBP8
FLCN
FLT3LG
FN1
FOS
FOXO1
FOXO3
FUNDC1
GAA
GAB1
GABARAP
GABARAPL1
GABARAPL2
GABARAPL3
GABBR2
GAPDH
GAPDHS
GATA4
GBF1
GFAP
GFER
GHRL
GJA4
GLIPR2
GNAI3
GNB2L1
GNRH2
GOLGA2
GOPC
GPR18
GPR182
GPR37
GRAMD1B
GRB2
GRID1
GRID2
GRP
GSK3B
GTF2IRD2B
HARBI1
HCK
HDAC1
HDAC10
HDAC2
HDAC4
HDAC5
HDAC6
HDAC7
HERC1
HGS
HIF1A
HIF3A
HIVEP2
HMGB1
HMOX1
HRAS
HSF1
HSP90AA1
HSP90AB1
HSPA1A
HSPA1B
HSPA1L
HSPA2
HSPA5
HSPA6
HSPA8
HSPB8
HSPG2
HTR2B
HTT
HUNK
IARS
ICMT
IDO1
IFNG
IFNGR1
IGF1
IGF1R
IKBKB
IKBKE
IKBKG
IL11
IL17A
IL1B
IL2
IL24
IL3
IL33
IL6
INS
INSR
INSRR
IRGM
IRS1
IRS2
IRS4
ITGA3
ITGA6
ITGB1
ITGB4
ITPR1
ITPR2
ITPR3
JUN
KAT5
KAT6A
KAT6B
KAT7
KAT8
KDM4A
KDR
KEAP1
KIAA0226
KIAA0226L
KIAA0652
KIAA0831
KIAA1524
KIF25
KIF5B
KIF5C
KLHL1
KLHL12
KLHL13
KLHL17
KLHL18
KLHL2
KLHL20
KLHL24
KLHL28
KLHL4
KLHL5
KLHL8
KPNA6
KRAS
KRT18
KRT5
KRT6A
KRT6B
KRT6C
KRT71
KRT72
KRT73
KRT74
KRT75
KRT76
KRT79
KRT8
KRT81
KRT82
KRT83
KRT84
KRT85
KSR1
LACRT
LAMP1
LAMP2
LAMP3
LAPTM4B
LARP1
LATS2
LCK
LEP
LEPR
LETM1
LMX1B
LPIN1
LPIN2
LRBA
LRRK2
LRSAM1
LYST
LZTS1
MAF1
MAN2A2
MAN2B1
MAN2C1
MAP1LC3A
MAP1LC3B
MAP1LC3C
MAP1S
MAP2K1
MAP2K2
MAP2K3
MAP2K4
MAP2K5
MAP2K7
MAP3K14
MAP3K6
MAP3K7
MAP4K1
MAP4K2
MAP4K3
MAP4K5
MAPK1
MAPK10
MAPK14
MAPK15
MAPK3
MAPK7
MAPK8
MAPK8IP1
MAPK9
MAPKAP1
MAPT
MARK1
MARK2
MARK3
MARK4
MBOAT4
MBTPS2
MCL1
MCOLN1
MCOLN3
MDM2
MEFV
MEGF10
MELK
MERTK
MET
MFN1
MFN2
MFSD8
MID2
MINK1
MITF
MLST8
MMP10
MT3
MTDH
MTM1
MTMR1
MTMR14
MTMR2
MTMR3
MTMR4
MTMR6
MTMR7
MTMR8
MTMR9
MTOR
MTRF1L
MVB12A
MX1
MX2
MYC
MYD88
MYL3
MYLK
MYLK3
MYO3A
MYOCD
NACC1
NAF1
NAMPT
NAPSA
NBEA
NBR1
NCF1
NCKAP1
NCOA4
NCR3
NDRG1
NEU3
NFE2L1
NFE2L2
NFE2L3
NFKB1
NFKB2
NFKBIA
NFKBIB
NFKBID
NFKBIE
NFKBIZ
NGF
NHLRC1
NKX2-3
NLRC3
NLRC4
NLRC5
NLRP1
NLRP12
NLRP13
NLRP14
NLRP3
NLRP4
NLRP5
NLRP6
NLRP7
NLRP8
NLRP9
NLRX1
NOD1
NOD2
NOS1
NOS2
NOS3
NPAS2
NPAS3
NPC1
NQO1
NR1D1
NRAS
NRBF2
NRBP2
NRG1
NRG2
NRG3
NTRK2
NUAK1
NUAK2
NUPR1
NVL
OCRL
OPA1
OPHN1
OPTN
OSTM1
P4HB
PA2G4
PAFAH1B2
PAK1
PAK2
PAK3
PAK4
PAK6
PAK7
PARK2
PARP1
PCGF1
PDK1
PDK2
PDK4
PDPK1
PEA15
PELP1
PEX1
PEX14
PEX3
PEX5
PEX5L
PGA3
PGA4
PGA5
PGAM5
PI4KB
PIK3C2A
PIK3C2B
PIK3C3
PIK3CA
PIK3CB
PIK3CD
PIK3CG
PIK3R1
PIK3R2
PIK3R4
PIM2
PINK1
PIP4K2A
PIP4K2B
PIP4K2C
PIP5K1A
PIP5K1B
PIP5K1C
PKM
PKN1
PKN2
PKN3
PLA2G4A
PLCB4
PLCD1
PLCE1
PLCG1
PLCH1
PLCH2
PLD1
PLD2
PLEKHF1
PLG
PLK2
PNCK
POC1A
POC1B
POLDIP2
POLG
PPARG
PPFIA4
PPP1CA
PPP1CC
PPP1R15A
PPP2CA
PPP2CB
PPP2R1A
PPP2R1B
PPP2R2A
PPP2R2B
PPP2R2C
PPP2R2D
PPP2R3A
PPP2R3B
PPP2R3C
PPP2R4
PPP2R5A
PPP2R5B
PPP2R5C
PPP2R5D
PPP2R5E
PPP4C
PPP6C
PREX1
PREX2
PRKAA1
PRKAA2
PRKAB1
PRKAB2
PRKACA
PRKACB
PRKAR1A
PRKCA
PRKCB
PRKCD
PRKCE
PRKCG
PRKCH
PRKCI
PRKCQ
PRKCZ
PRKD1
PRKDC
PRMT1
PRMT3
PRMT8
PRNP
PRODH
PRR5
PRR5L
PSAP
PSEN1
PTEN
PTGER2
PTK6
PTPN22
PYCARD
QSOX1
RAB10
RAB11A
RAB12
RAB1A
RAB1B
RAB24
RAB33B
RAB5A
RAB5B
RAB5C
RAB7A
RAB8A
RAB9A
RABGEF1
RAC1
RAC3
RAF1
RALA
RALB
RALGAPA1
RALGAPA2
RALGAPB
RAPGEF3
RASD2
RASIP1
RB1
RB1CC1
RCAN1
REL
RELA
RELB
RET
RGL1
RGS19
RHEB
RICTOR
RIPK1
RIPK4
RNASEL
RNF152
RNF5
RNF7
ROCK1
ROCK2
RPS6KA1
RPS6KA3
RPS6KA4
RPS6KA6
RPS6KB1
RPS6KB2
RPTOR
RRAGA
RRAGB
RRAGC
RRAGD
RUBCN
RUNX1
RUNX3
RYR1
RYR2
S100A8
S100A9
S1PR3
SAR1A
SAR1B
SBF2
SCD
SCOC
SDHB
SEC16A
SEC16B
SEC23A
SEC23B
SEC24B
SEC24C
SEC24D
SERPINA1
SERPINH1
SESN1
SESN2
SESN3
SGK2
SGSM2
SH3BP4
SH3GL1
SH3GL2
SH3GL3
SH3GLB1
SH3GLB2
SHC1
SHC2
SHC3
SHC4
SIDT1
SIDT2
SIK1
SIK2
SIK3
SIM2
SIN3A
SIN3B
SIPA1L3
SIRT1
SIRT2
SIRT6
SLC1A1
SLC1A2
SLC1A4
SLC1A5
SLC1A6
SLC1A7
SLC33A1
SLC36A1
SLC36A4
SLC3A1
SLC3A2
SLC7A10
SLC7A11
SLC7A5
SLC7A6
SLC7A7
SLC7A8
SLC7A9
SMAD2
SMAD4
SMPD1
SMPDL3B
SMYD3
SNAI1
SNAP29
SNCA
SNF8
SNRK
SNRNP40
SNRPE
SNX1
SNX30
SNX4
SOAT1
SOD1
SOD2
SOGA1
SORCS2
SOS1
SOS2
SOX2
SPATA13
SPATA5
SPATA5L1
SPG7
SPHK1
SPNS1
SPP1
SPTLC1
SPTLC2
SPTSSA
SQSTM1
SRC
SREBF2
SRPX
ST13
STAM
STAM2
STAT1
STIM1
STK11
STK24
STK25
STK26
STK36
STK38
STK38L
STK4
STUB1
STX17
STX7
STX8
STXBP1
STXBP2
STXBP3
SUPT20H
SUPT5H
SVIP
SYNPO2
TAB2
TAB3
TACR2
TAS1R3
TBC1D10A
TBC1D10B
TBC1D10C
TBC1D12
TBC1D14
TBC1D16
TBC1D17
TBC1D25
TBC1D4
TBC1D5
TBC1D7
TBC1D9
TBC1D9B
TBK1
TCHP
TCIRG1
TECPR1
TELO2
TEP1
TFE3
TFEB
TGFB1
TGFBRAP1
THBS2
THPO
TICAM1
TICAM2
TIGAR
TLR1
TLR3
TLR4
TLR5
TLR6
TLR7
TLR9
TM9SF1
TM9SF2
TM9SF3
TM9SF4
TMBIM6
TMEM173
TMEM49
TMEM59
TMEM74
TNF
TNFAIP2
TNFRSF10B
TNFSF10
TNIK
TNS1
TNS2
TNS3
TOMM7
TOP1MT
TOR1B
TP53
TP53INP1
TP53INP2
TP63
TP73
TPCN1
TPCN2
TPR
TPTE2
TRADD
TRAF1
TRAF2
TRAF3
TRAF4
TRAF5
TRAF6
TRAPPC1
TRAPPC10
TRAPPC2
TRAPPC3
TRAPPC4
TRAPPC5
TRAPPC6A
TRAPPC6B
TRAPPC8
TRAPPC9
TRIB3
TRIM13
TRIM17
TRIM21
TRIM22
TRIM5
TRIM65
TRIM8
TRRAP
TSC1
TSC2
TSG101
TUFM
TUSC1
UBASH3B
UBB
UBC
UBE2A
UBE2D2
UBE2D3
UBE2H
UBE2J2
UBE2L3
UBE2N
UBQLN1
UBR4
UCP2
UGT1A1
UGT1A10
UGT1A6
UGT1A9
UGT2A1
UGT2A3
UGT2B10
UGT2B15
UGT2B17
UGT2B28
UGT2B4
UGT2B7
ULK1
ULK2
ULK3
USP10
USP13
USP19
USP30
USP33
UVRAG
VAMP3
VAMP7
VAMP8
VCP
VDAC1
VDAC2
VDAC3
VEGFA
VIM
VMP1
VPS13A
VPS13C
VPS16
VPS18
VPS25
VPS28
VPS33A
VPS33B
VPS36
VPS37A
VPS37B
VPS37C
VPS37D
VPS39
VPS41
VPS45
VPS51
VTI1A
VTI1B
WAC
WASHC1
WDFY3
WDFY4
WDR24
WDR3
WDR45
WDR45B
WDR45L
WDR5
WDR5B
WDR6
WIPI1
WIPI2
XBP1
XPO1
YES1
YME1L1
YWHAQ
ZBTB24
ZC3H12A
ZFYVE1
ZKSCAN3
